# Supplementary material for: The microRNA-455 Null Mouse Has Memory Deficit and Increased Anxiety, Targeting Key Genes Involved in Alzheimer’s Disease
Source: MDPI journal article supplement (doi:10.3390/ijms23010554), 2022-01-05
Supplement: s1 [file s1]

Table S1: Statistical analyses

| Experiment                                           | Dataset 1<br>(mean+/- SEM)                   | Dataset 2<br>(mean+/- SEM)                   | p-value   |
|------------------------------------------------------|----------------------------------------------|----------------------------------------------|-----------|
| Weight of 14 month old mice, wild-type vs null       | 38.07±1.950                                  | 45.59±2.464                                  | 0.025     |
| Level of miR-455-3- across age 3 weeks vs 1 year     | 2.94x10 <sup>-6</sup> ±5.57x10 <sup>-7</sup> | 1.04x10 <sup>-6</sup> ±3.30x10 <sup>-7</sup> | 0.04      |
| Novel object recognition, wild-type vs null          | 0.400±0.094                                  | -0.0163±0.074                                | 0.0038    |
| Open field test, time in centre, wild-type vs null   | 8.450±1.613                                  | 4.814±1.087                                  | 0.09      |
| Open field test, total distance travelled            | 77.25±8.081                                  | 74.03±5.795                                  | NS        |
| Luciferase activity, BACE1 UTR ± miR-455-3p          | 1.019±0.048                                  | 0.8023±0.030                                 | 0.008     |
| Luciferase activity, BACE1 UTR mutant ± miR-455-3p   | 1.035±0.063                                  | 0.987±0.096                                  | NS        |
| Luciferase activity, TAU UTR ± miR-455-3p            | 20.901±0.017                                 | 1.711±0.055                                  | 0.0006    |
| Luciferase activity, TAU UTR mutant ± miR-455-3p     | 2.175±0.055                                  | 2.294±0.246                                  | NS        |
| <i>APP</i> , SH-SY5Y cells, qRT-PCR, ± miR-455-3p    | 1.02x10 <sup>-4</sup> ±1.68x10 <sup>-5</sup> | 6.40x10 <sup>-5</sup> ±5.93x10 <sup>-6</sup> | NS        |
| <i>BACE1</i> , SH-SY5Y cells, qRT-PCR, ± miR-455-3p  | 3.31x10 <sup>-5</sup> ±2.94x10 <sup>-6</sup> | 2.30x10 <sup>-5</sup> ±3.03x10 <sup>-6</sup> | NS (0.09) |
| <i>TAU</i> , SH-SY5Y cells. qRT-PCR, ± miR-455-3p    | 4.31x10 <sup>-5</sup> ±6.67x10 <sup>-6</sup> | 2.72x10 <sup>-5</sup> ±2.82x10 <sup>-6</sup> | NS (0.09) |
| <i>APP</i> , hippocampus, qRT-PCR, WT vs null        | 9.66x10 <sup>-4</sup> ±6.20x10 <sup>-5</sup> | 8.75x10 <sup>-4</sup> ±4.53x10 <sup>-5</sup> | NS        |
| <i>BACE1</i> , hippocampus, qRT-PCR, WT vs null      | 2.94x10 <sup>-5</sup> ±2.50x10 <sup>-6</sup> | 3.19x10 <sup>-5</sup> ±2.16x10 <sup>-6</sup> | NS        |
| <i>TAU</i> , hippocampus, qRT-PCR, WT vs null        | 1.87x10 <sup>-4</sup> ±8.01x10 <sup>-5</sup> | 2.26x10 <sup>-4</sup> ±1.37x10 <sup>-5</sup> | P=0.046   |
| <i>APP</i> , hippocampus, western blot, WT vs null   | 1.087±0.176                                  | 2.544±0.049                                  | 0.0013    |
| <i>BACE1</i> , hippocampus, western blot, WT vs null | 0.694±0.105                                  | 1.016±0.039                                  | 0.0447    |
| <i>TAU</i> , hippocampus, western blot, WT vs null   | 0.364±0.147                                  | 0.607±0.173                                  | NS        |
